# Supplementary material
Source: MDPI journal article supplement (https://www.mdpi.com/2073-4344/11/6/723)
Supplement: s1 [file s1]

*Supporting Materials*

# Solid-State Redox Kinetics of $\text{CeO}_2$ in Two-Step Solar $\text{CH}_4$ Partial Oxidation and Thermochemical $\text{CO}_2$ Conversion

Mahesh Muraleedharan Nair and Stéphane Abanades \*

Processes, Materials and Solar Energy Laboratory, PROMES-CNRS (UPR 8521), 7 Rue du Four Solaire, 66120 Font-Romeu Odeillo, France; mnair.mahesh@gmail.com

\* Correspondence: Stephane.Abanades@promes.cnrs.fr; Tel.: +33-(0)4-68-30-77-30

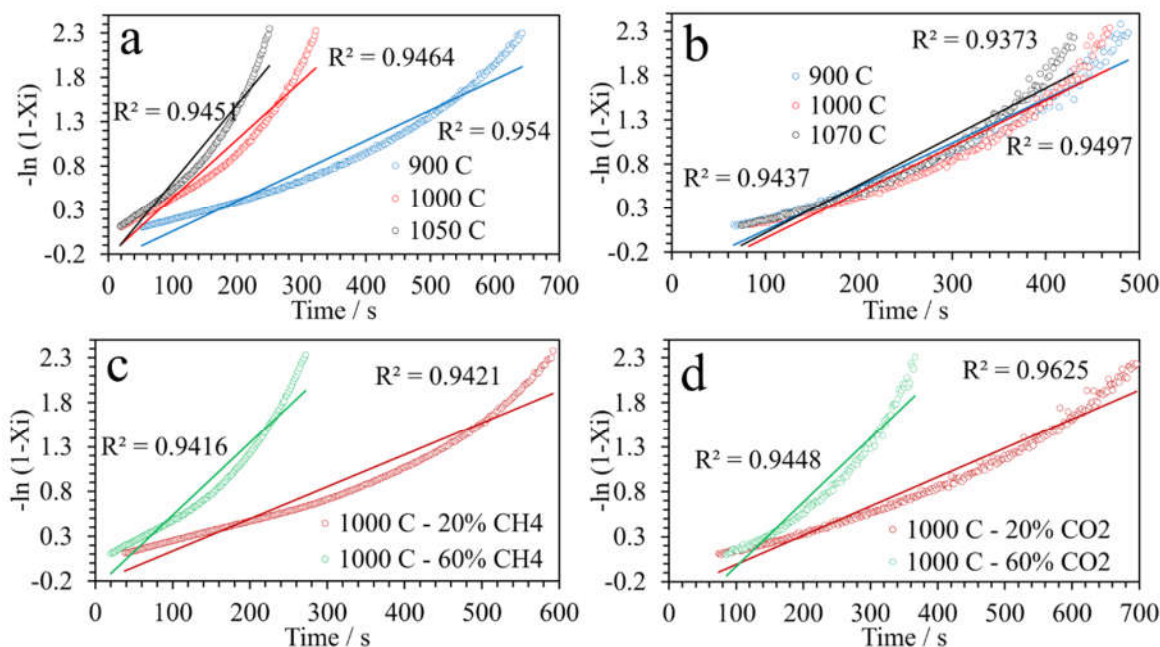

**Figure S1.** Comparison of experimental conversion data with first order model (F1) predictions for  $\text{CeO}_2$  during (a)  $\text{CH}_4$  induced reduction at selected temperatures, (b)  $\text{CO}_2$  induced re-oxidation at selected temperatures, (c) varying  $\text{CH}_4$  partial pressure during reduction, and (d) varying  $\text{CO}_2$  partial pressure during re-oxidation. Partial pressure of the reactant gases was kept at 40% in (a) and (b). Experiments with varying partial pressures in (c) and (d) were carried out at 1000 °C.

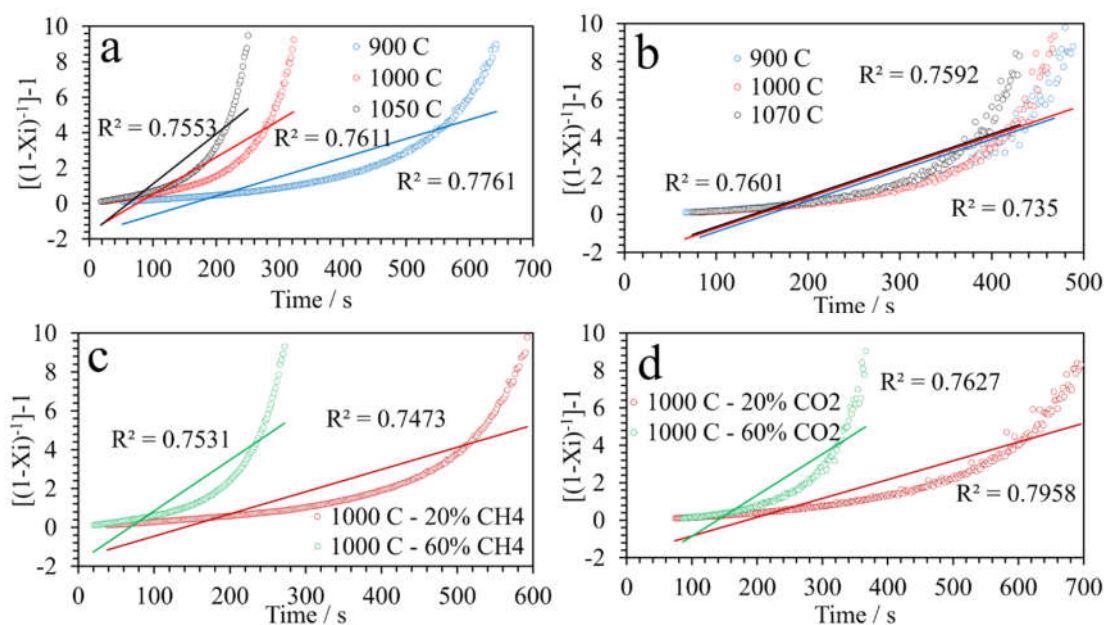

**Figure S2.** Comparison of experimental conversion data with power law model (PLM) predictions for  $\text{CeO}_2$  during (a)  $\text{CH}_4$  induced reduction at selected temperatures, (b)  $\text{CO}_2$  induced re-oxidation at selected temperatures, (c) varying  $\text{CH}_4$  partial pressure during reduction, and (d) varying  $\text{CO}_2$  partial pressure during re-oxidation. Partial pressure of the reactant gases was kept at 40% in (a) and (b). Experiments with varying partial pressures in (c) and (d) were carried out at 1000 °C.

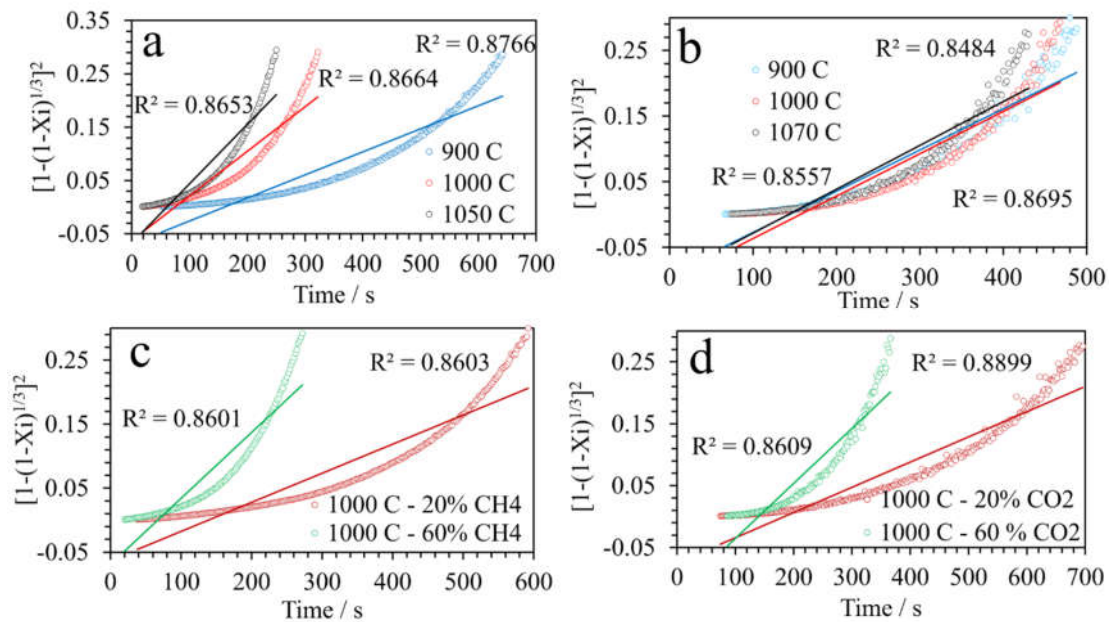

**Figure S3.** Comparison of experimental conversion data with 3D Janders diffusion (D3) model predictions for  $\text{CeO}_2$  during (a)  $\text{CH}_4$  induced reduction at selected temperatures, (b)  $\text{CO}_2$  induced re-oxidation at selected temperatures, (c) varying  $\text{CH}_4$  partial pressure during reduction, and (d) varying  $\text{CO}_2$  partial pressure during re-oxidation. Partial pressure of the reactant gases was kept at 40% in (a) and (b). Experiments with varying partial pressures in (c) and (d) were carried out at 1000 °C.

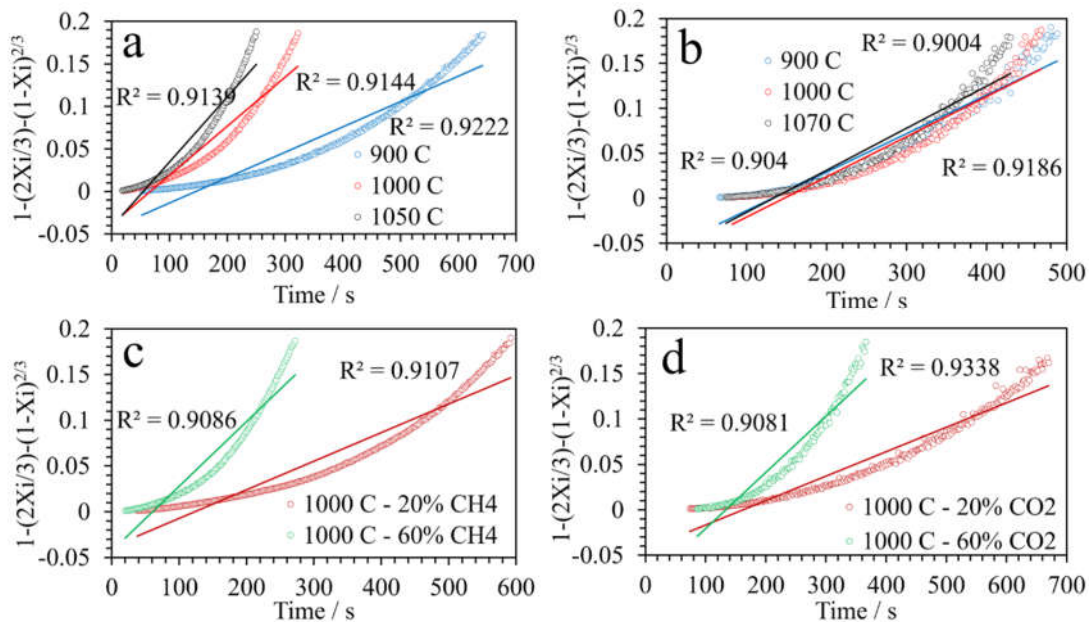

**Figure S4.** Comparison of experimental conversion data with 3D Ginstling diffusion (D4) model predictions for  $\text{CeO}_2$  during (a)  $\text{CH}_4$  induced reduction at selected temperatures, (b)  $\text{CO}_2$  induced re-oxidation at selected temperatures, (c) varying  $\text{CH}_4$  partial pressure during reduction, and (d) varying  $\text{CO}_2$  partial pressure during re-oxidation. Partial pressure of the reactant gases was kept at 40% in (a) and (b). Experiments with varying partial pressures in (c) and (d) were carried out at 1000 °C.

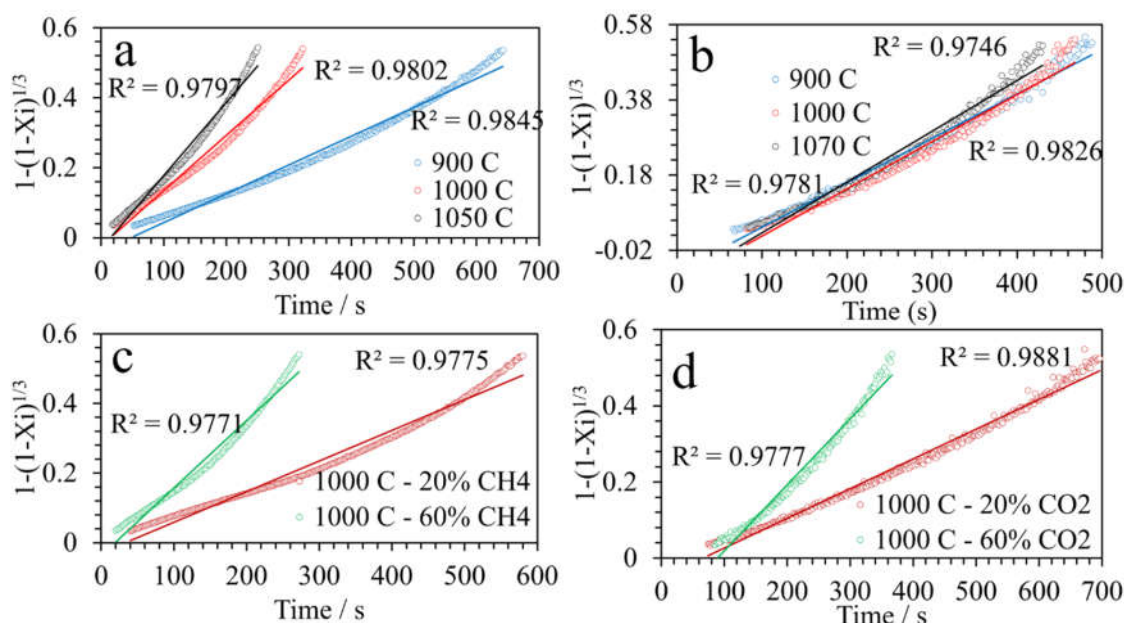

**Figure S5.** Comparison of experimental conversion data with 3D SCM (R3) predictions for CeO<sub>2</sub> during (a) CH<sub>4</sub> induced reduction at selected temperatures, (b) CO<sub>2</sub> induced re-oxidation at selected temperatures, (c) varying CH<sub>4</sub> partial pressure during reduction, and (d) varying CO<sub>2</sub> partial pressure during re-oxidation. Partial pressure of the reactant gases was kept at 40% in (a) and (b). Experiments with varying partial pressures in (c) and (d) were carried out at 1000 °C.

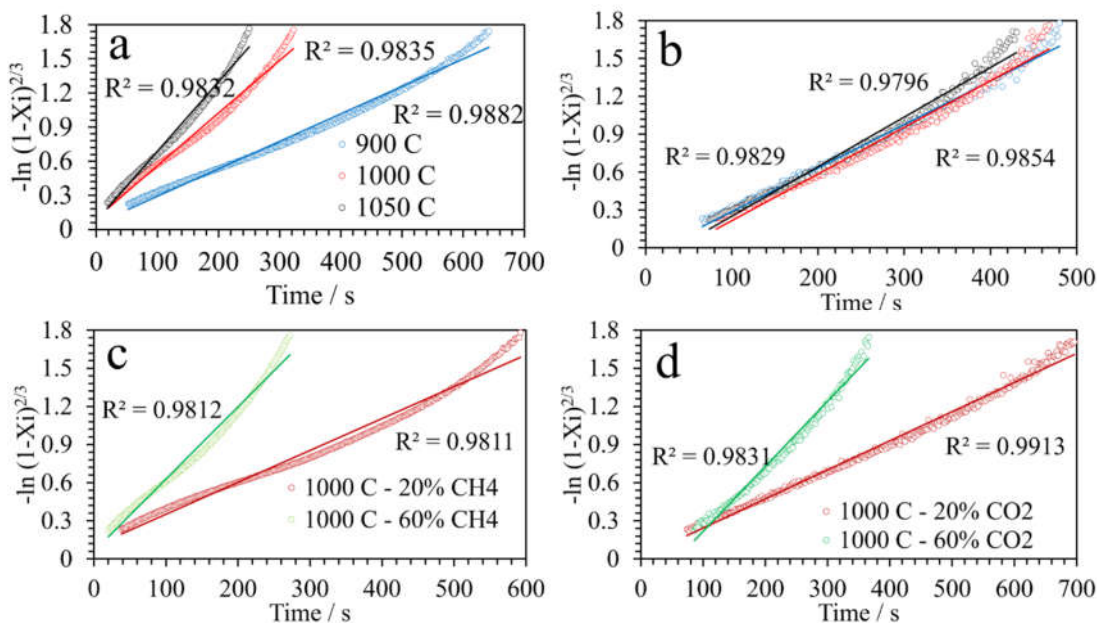

**Figure S6.** Comparison of experimental conversion data with 3D NGM (AE3) predictions for CeO<sub>2</sub> during (a) CH<sub>4</sub> induced reduction at selected temperatures, (b) CO<sub>2</sub> induced re-oxidation at selected temperatures, (c) varying CH<sub>4</sub> partial pressure during reduction, and (d) varying CO<sub>2</sub> partial pressure during re-oxidation. Partial pressure of the reactant gases was kept at 40% in (a) and (b). Experiments with varying partial pressures in (c) and (d) were carried out at 1000 °C.
